# Supplementary material for: Titanium(iv) oxide having a copper co-catalyst: a new type of semihydrogenation photocatalyst working efficiently at an elevated temperature under hydrogen-free and poison-free conditions
Source: Royal Society of Chemistry journal article supplement (doi:10.1039/c8cp02316f), 2018-01-01
Supplement: c8cp02316f1.pdf [file c8cp02316f1.pdf]

## Electronic Supplement Information

### **Titanium(IV) oxide having a copper co-catalyst: A new type of semihydrogenation photocatalyst working efficiently at an elevated temperature under hydrogen-free and poison-free conditions**

*Hiroshi Kominami,<sup>\*a</sup> Misaki Shiba,<sup>a</sup> Akimi Hashimoto,<sup>a</sup> Shota Imai,<sup>a</sup> Kousuke Nakanishi,<sup>b</sup> Atsuhiko Tanaka,<sup>a</sup> Keiji Hashimoto,<sup>a</sup> and Kazuya Imamura<sup>a,‡</sup>*

<sup>a</sup> Department of Applied Chemistry, Faculty of Science and Engineering, Kindai University, 3-4-1 Kowakae, Higashiosaka, Osaka 577-8502, Japan.

<sup>b</sup> Molecular and Material Engineering, Interdisciplinary Graduate School of Science and Engineering, Kindai University, 3-4-1, Kowakae, Higashiosaka, Osaka 577-8502, Japan

E-mail: hiro@apch.kindai.ac.jp

<sup>‡</sup> Present address: Research Laboratory of Hydrothermal Chemistry, Faculty of Science and Technology, Kochi University, Akebono-cho 2-5-1, Kochi City, Kochi 780-8520, Japan.

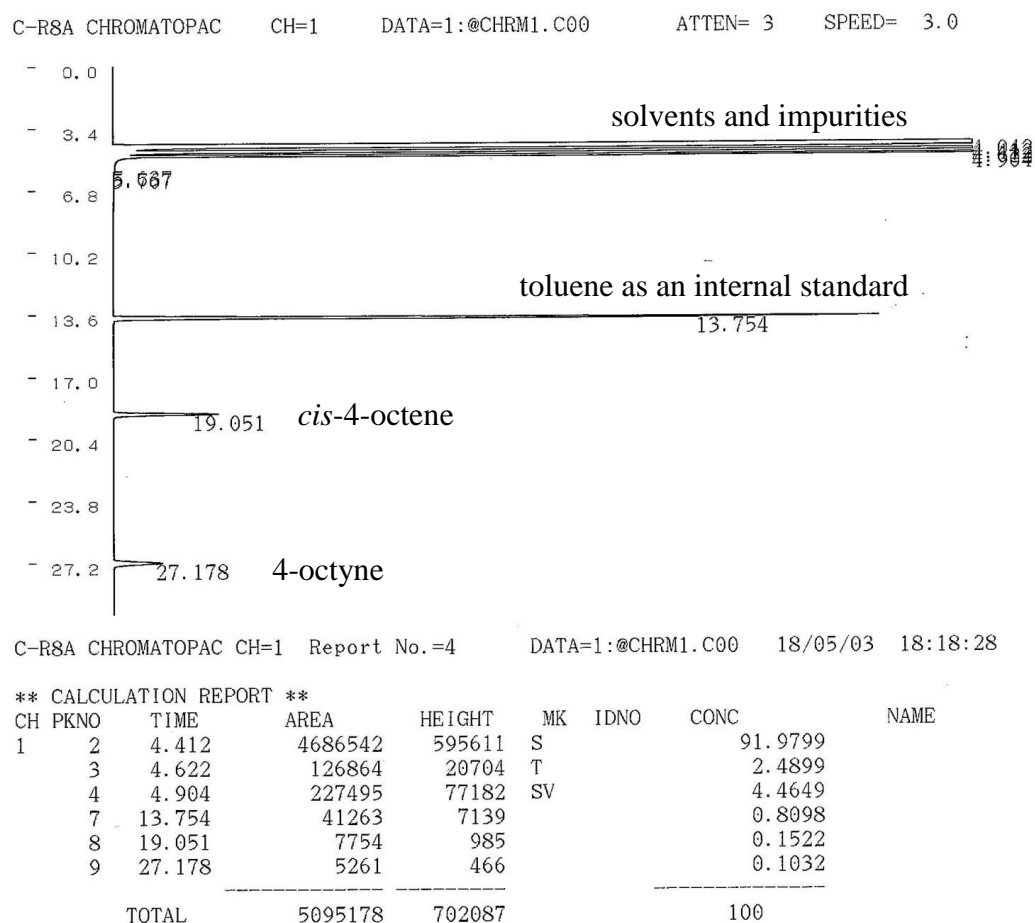

**Figure S1** GC data of hydrocarbon analysis in the photocatalytic hydrogenation of 4-octyne at 298 K.

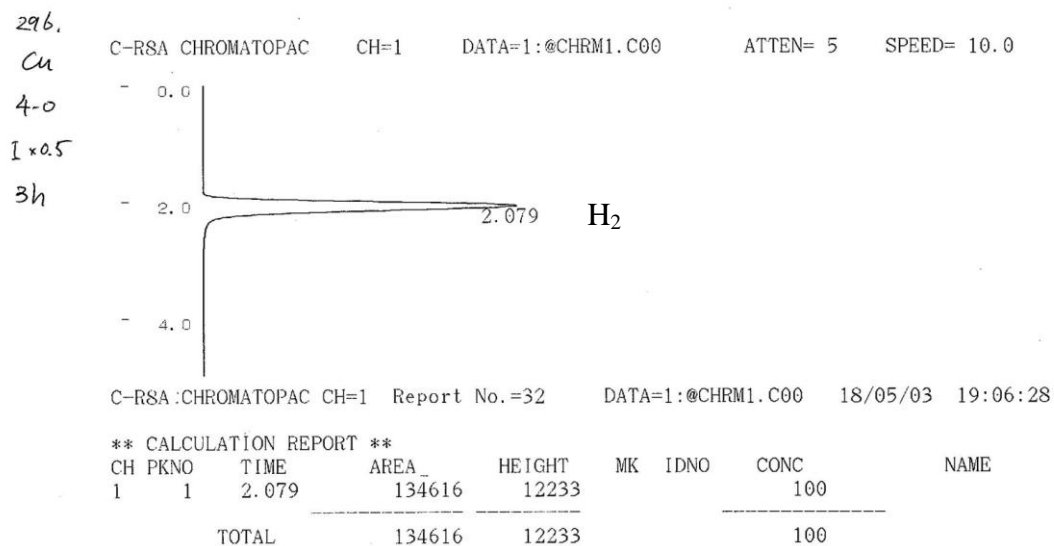

**Figure S2** GC data of gas analysis in the photocatalytic hydrogenation of 4-octyne at 298 K.
